# Supplementary material for: Emergent hydrogen bonding in dense LiOD
Source: Royal Society of Chemistry journal article supplement (doi:10.1039/d1ma01024g), 2021-12-22
Supplement: d1ma01024g1.pdf [file d1ma01024g1.pdf]

# Supplementary Information

## Emergent hydrogen bonding in dense LiOD

Christopher J. Ridley,<sup>1,\*</sup> Craig L. Bull,<sup>1,2</sup> and Nicholas P. Funnell<sup>1</sup>

<sup>1</sup>ISIS Neutron and Muon Source, Rutherford Appleton Laboratory, Chilton, Didcot OX11 0QX, UK

<sup>2</sup>School of Chemistry, University of Edinburgh, David Brewster Road, Edinburgh EH9 3FJ, UK

(Dated: December 2, 2021)

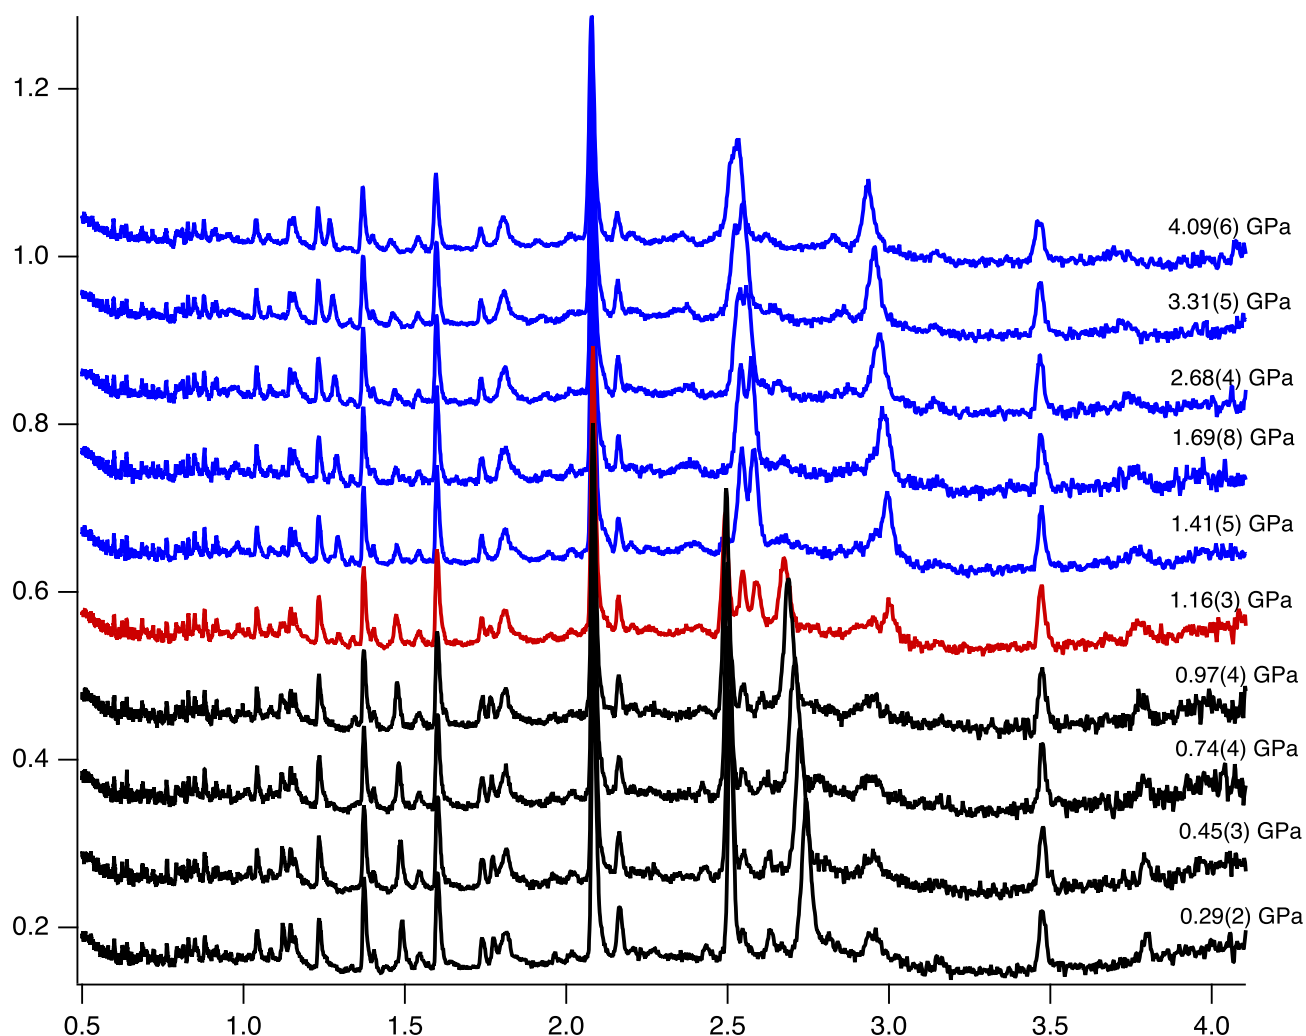

FIG. S1. High pressure data from LiOD collected on the PEARL diffractometer. Pressures, determined from the equation of state of the  $\text{Li}_2\text{CO}_3$ , are indicated above each profile. From bottom to top, pure phase-II data are shown in black (up to 0.97 GPa), mixed phase in red (1.16 GPa), and pure phase-III in blue (up to 4.09 GPa) (colour online).

\* Corresponding author: christopher.ridley@stfc.ac.uk

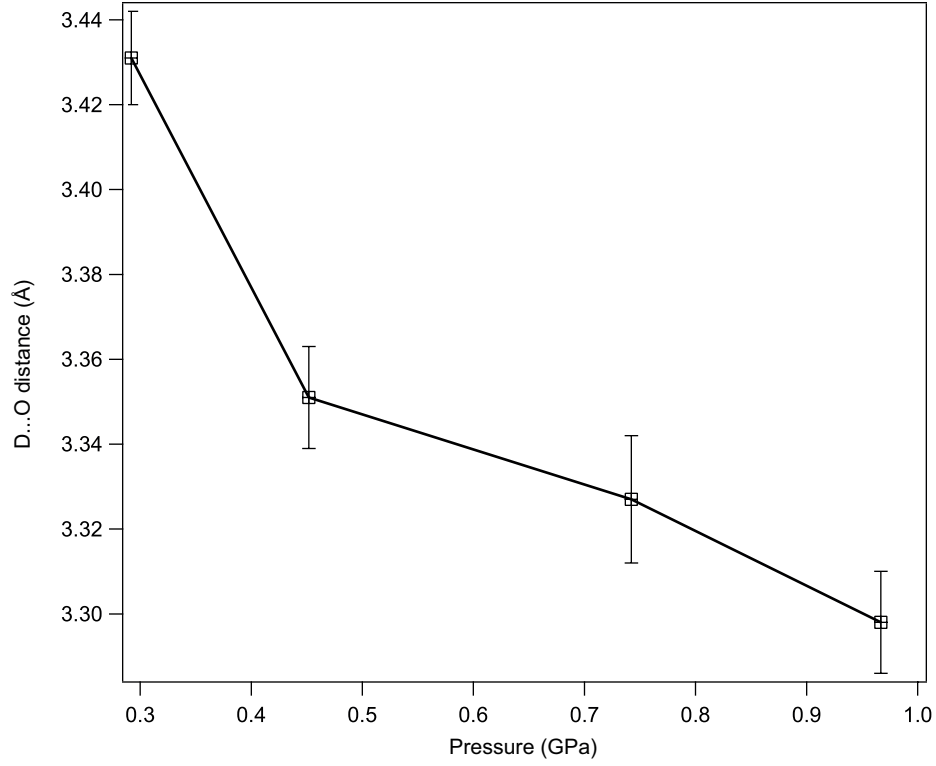

FIG. S2. Variation in D...O separation as a function of pressure in phase-II of LiOD.

### Strain calculation

The pseudo cubic axis length can be defined as  $a_o = \sqrt[3]{a^2c}$ , from the tetragonal lattice parameters ( $a$ ,  $c$ ) in each phase. Where the axes between the pseudo-cubic and tetragonal cells are defined to be orthogonal, the two principal strains are then defined as,  $\epsilon_1 = a/a_o - 1$  and  $\epsilon_3 = c/a_o - 1$ , and the total spontaneous strain can then be calculated as,  $\epsilon_s = \sqrt{\epsilon_1^2 + \epsilon_3^2}$ . The volumetric strain may be calculated similarly as  $V/a_o^3 - 1$ .

### Crystallographic data

TABLE S1. Crystallographic data for the 300 K compression of phase-II of LiOD determined from Rietveld analysis of the PEARL neutron powder diffraction data. All refinements are performed using the  $P4/nmm$  tetragonal space-group with Li: Wyckoff 2a ( $3/4, 1/4, 0$ ), O and D: Wyckoff 2c ( $1/4, 1/4, z$ ). The atomic coordinates were not refined for the 1.16(3) GPa mixed phase pressure point, due to instability, and are therefore omitted.

| Pressure (GPa)               | 0.29(2)    | 0.45(3)     | 0.74(4)     | 0.97(4)    | 1.16(3)    |
|------------------------------|------------|-------------|-------------|------------|------------|
| $a$ -axis (Å)                | 3.5435(3)  | 3.53731(12) | 3.53097(14) | 3.5245(2)  | 3.5207(2)  |
| $c$ -axis (Å)                | 4.3211(7)  | 4.2578(8)   | 4.2011(9)   | 4.1437(9)  | 4.10204    |
| $V_{cell}$ (Å <sup>3</sup> ) | 54.257(11) | 53.276(10)  | 52.378(12)  | 51.472(12) | 50.845(14) |
| O $z$                        | 0.191(2)   | 0.184(2)    | 0.201(3)    | 0.206(2)   | -          |
| D $z$                        | 0.397(2)   | 0.397(2)    | 0.409(2)    | 0.410(2)   | -          |

TABLE S2. Crystallographic data for the 300 K compression of phase-III of LiOD determined from Rietveld analysis of the PEARL neutron powder diffraction data. All refinements performed using the  $I4_1acd$  tetragonal space-group with Li: Wyckoff 8a (0,  $\frac{1}{4}$ ,  $\frac{3}{8}$ ), and Wyckoff 8b (0,  $\frac{1}{4}$ ,  $\frac{1}{8}$ ), O and D: Wyckoff 16e (x, 0,  $\frac{1}{4}$ ). The atomic coordinates were not refined for the 1.16(3) GPa mixed phase pressure point, due to instability, and are therefore omitted.

| Pressure (GPa)                | 1.16(3)    | 1.41(5)      | 1.69(8)      | 2.68(4)      | 3.31(5)      | 4.09(6)    |
|-------------------------------|------------|--------------|--------------|--------------|--------------|------------|
| $a$ -axis ( $\text{\AA}$ )    | 5.9988(9)  | 5.9831(7)    | 5.9616(7)    | 5.9334(6)    | 5.9011(6)    | 5.8547(6)  |
| $c$ -axis ( $\text{\AA}$ )    | 10.161(2)  | 10.14925(13) | 10.13193(14) | 10.09916(13) | 10.06056(12) | 10.0161(2) |
| $V_{cell}$ ( $\text{\AA}^3$ ) | 365.65(11) | 363.32(8)    | 360.09(8)    | 355.54(7)    | 350.33(6)    | 343.32(7)  |
| Ox                            | -          | 0.508(2)     | 0.510(2)     | 0.5109(13)   | 0.5102(12)   | 0.5131(12) |
| Dx                            | -          | 0.8209(12)   | 0.821(2)     | 0.8274(12)   | 0.8254(12)   | 0.8218(14) |

### Equation of state

A second order Birch-Murnaghan equation of state was fitted to the pressure-volume data for phase-II and -III, where  $V_0$  is the unit-cell volume at zero pressure, and  $K_0$  is the bulk modulus:

$$P = \frac{3}{2}K_0 \left[ \left( \frac{V_0}{V} \right)^{7/3} - \left( \frac{V_0}{V} \right)^{5/3} \right]$$

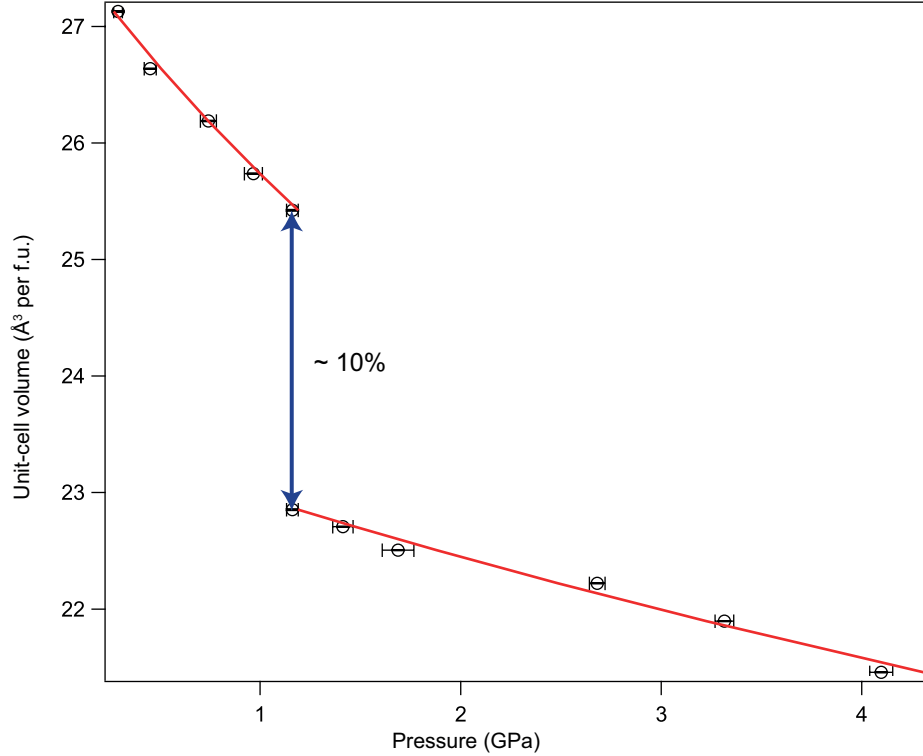

FIG. S3. Unit-cell volume (per formula-unit) vs. pressure for phase-II and phase-III of LiOD. A second-order Birch-Murnaghan equation of state was fitted to each phase, the parameters of which are provided in the main manuscript, and are shown as red lines over the data points.

# Hydrogen bonding networks

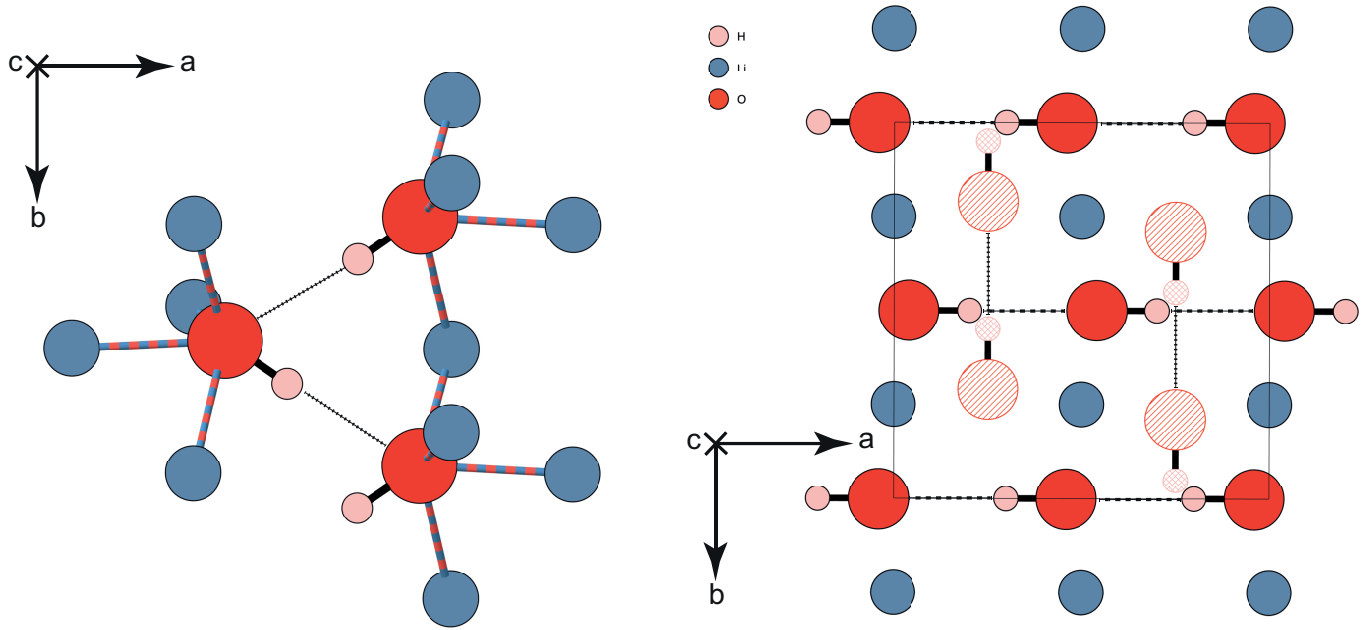

FIG. S4. Hydrogen bonding networks for (left) the monoclinic ( $P2_1/c$ ) structure of LiOD based on the low temperature structure of NaOD and (right) the tetragonal ( $I4_1/acd$ ) structure, with the Li-O bonds omitted for clarity. Dashed lines represent hydrogen bonds in each case. The monoclinic structure forms zig-zag chains along the  $b$ -axis, forming a canted antiferroelectric-type arrangement between lines of oxygen atoms. The tetragonal ( $I4_1/acd$ ) structure forms linear hydrogen bonds along the  $a$ - and  $b$ -axes, alternating between planes along the  $c$ -axis. The ordering is antiferroelectric like.
